# Supplementary material for: Sandwich-like layer-by-layer assembly of gold nanoparticles with tunable SERS properties
Source: publisher site journal article supplement (doi:10.3762/bjnano.7.95), 2016-07-15
Supplement: Additional file 1 [file 2190-4286-7-95-S1.pdf]

## **Supporting Information**

for

### **Sandwich-like layer-by-layer assembly of gold nanoparticles with tunable SERS properties**

Zhicheng Liu\*<sup>1</sup>, Lu Bai<sup>2</sup>, Guizhe Zhao<sup>1</sup> and Yaqing Liu\*<sup>1</sup>

Address: <sup>1</sup>Shanxi Province Key Laboratory of Functional Nanocomposites, School of Materials Science and Engineering, North University of China, Taiyuan 030051, China and <sup>2</sup>School of Chemical and Environmental Engineering, North University of China, Taiyuan 030051, China

Email: Zhicheng Liu\* - zcliu11@gmail.com ; Yaqing Liu\* - zfflyq98@163.com

\* Corresponding author

### **Additional experimental data**

## Calculation of the EF value:

$$EF = (I_{\text{SERS}}/N_{\text{ads}})/(I_{\text{bulk}}/N_{\text{bulk}})$$

$N_{\text{bulk}}$  is the number of molecules of the solid 4-ATP in the laser illumination volume. In our work, the laser spot of 100  $\mu\text{m}$  in diameter and the penetration depth (ca. 180  $\mu\text{m}$ ) of the focused laser beam are used. Taking the density of the solid 4-ATP (1.18  $\text{g}/\text{cm}^3$ ) into account,  $N_{\text{bulk}}$  was calculated to be about  $8 \times 10^{15}$  molecules within the illuminated laser light.

$N_{\text{abs}}$  can be obtained according to the method proposed by Murphy and co-workers [1]. According to the report by Kim et al., each 4-ATP molecule occupies ca. 0.20  $\text{nm}^2$  on the surface of Au nanoparticles [2]. Because the laser spot is about  $7.85 \times 10^{-5} \text{ cm}^2$ , the number of the molecules on the BBB thin film within the laser spot is assumed to be  $1.8 \times 10^{11}$ . This is estimated by counting the number of the big Au nanoparticles on the spot and calculating the surface area of those Au nanoparticles.

Taking account of the intensity ratio of the 1587  $\text{cm}^{-1}$  band, the the EF value for the BBB thin films are calculated to be ca.  $3.6 \times 10^4$ . Other EF values could be obtained similarly.

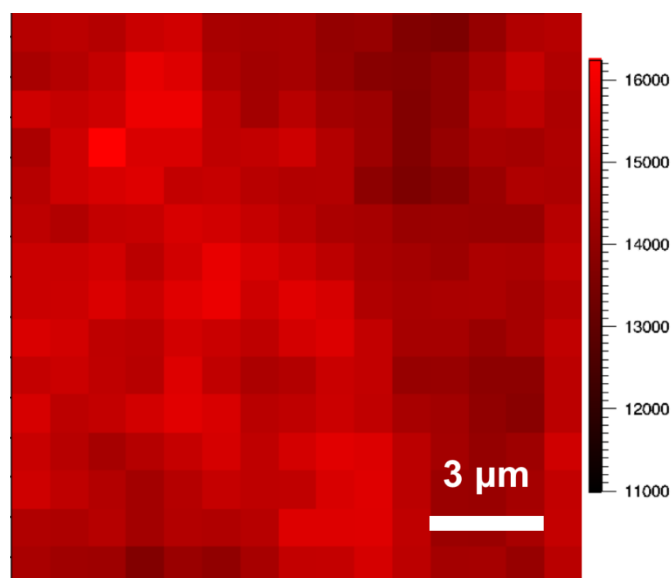

**Figure S1:** SERS mapping ( $15 \times 15 \mu\text{m}^2$ , step 1  $\mu\text{m}$ ) of the 1078  $\text{cm}^{-1}$  band of 4-ATP on the BBB thin film. The spectra were measured using a laser scanning confocal spectrometer (Renishaw inVia) with a 785 nm laser excitation.

## References

[1] Orendorff, C. J.; Gole, A.; Sau, T. K.; Murphy, C. J. *Anal. Chem.* **2005**, *77*, 3261.

doi:10.1021/ac048176x

[2] Kim, K.; Yoon, J. K. *J. Phys. Chem. B.* **2005**, *109*, 20731. doi:10.1021/jp052829b
